# Supplementary material for: Production, characterization and determination of the real catalytic properties of the putative ‘succinate dehydrogenase’ from Wolinella succinogenes
Source: PubMed Central journal article supplement (PMC2680327; doi:10.1111/j.1365-2958.2008.06581.x), 2009-01-16
Supplement: mmi0071-1088-SD1.pdf [file mmi0071-1088-SD1.pdf]

## **Supporting Information:**

### **Production, Characterization, and Determination of the Real Catalytic Properties**

#### **of the Putative ‘Succinate Dehydrogenase’ from *Wolinella succinogenes***

*Hanno D. Juhnke*<sup>1,||</sup>, *Heiko Hiltcher*<sup>1,†</sup>, *Hamid R. Nasiri*<sup>2,‡</sup>, *Harald Schwalbe*<sup>2</sup>,

*and C. Roy D. Lancaster*<sup>1,3,\*</sup>

<sup>1</sup> Cluster of Excellence “Macromolecular Complexes”, Max Planck Institute of Biophysics, Dept. of Molecular Membrane Biology, Max-von-Laue-Str. 3, D-60438 Frankfurt am Main, Germany

<sup>2</sup> Cluster of Excellence “Macromolecular Complexes”, Institute of Organic Chemistry and Chemical Biology, Center for Biomolecular Magnetic Resonance, Johann Wolfgang Goethe University, Max-von-Laue-Str. 7, D-60438 Frankfurt am Main, Germany

<sup>3</sup> Department of Structural Biology, Faculty of Medicine, Saarland University, D-66421 Homburg (Saar), Germany

<sup>||</sup> present address: Sanofi-Aventis Deutschland GmbH, QA Operations, Industriepark Höchst, Bldg. H500, D-65926 Frankfurt am Main, Germany

<sup>†</sup> present address: Botanisches Institut, Heinrich-Heine-Universität Düsseldorf, Universitätsstr. 1, D-40225 Düsseldorf, Germany

<sup>‡</sup> present address: Department of Chemistry, University of Cambridge, Lensfield Road, Cambridge CB2 1EW, United Kingdom

\* To whom correspondence should be addressed: Dept. of Structural Biology, Faculty of Medicine, Saarland University, D-66421 Homburg (Saar), Germany,

E-mail: Roy.Lancaster@structural-biology.eu, Tel.: +49 6841 1626 235, Fax.: +49 1212 616 041 965

**SUPPORTING TABLE 1.** Strains, plasmids and oligonucleotide primers used in the present study.

**SUPPORTING FIGURE 1.** SDS-PAGE for peptide mass fingerprint analysis.

**SUPPORTING FIGURE 2.** Determination of the molar oxidized-minus-reduced absorption difference coefficient at 270 nm of the 8-MMKH<sub>2</sub>-6 analog 2,8-dimethyl-3-decyl-1,4-dihydroxynaphthoquinol.

**SUPPORTING FIGURE 3.** Sequence alignment of the amino-termini of *W. succinogenes* (*Ws*), *C. jejuni* (*Cj*), *A. ambivalens* (*Aa*) and *Synechocystis* (*Sc*) SdhA.

**SUPPORTING FIGURE 4.** Western blot analysis of the variant SdhABE complexes MFR-HT and MFR-AH1.

**SUPPORTING FIGURE 5.** Comparison of residues involved in fumarate reduction in the *W. succinogenes* quinol:fumarate reductase and the MFR.

### **SUPPORTING REFERENCES**

## SUPPORTING TABLE 1.

### Strains, plasmids and oligonucleotide primers used in the present study.

| Strain, plasmid or primer                     | Relevant properties, usage, nucleotide sequence                                                                                                                                                                          | Reference                                                       |
|-----------------------------------------------|--------------------------------------------------------------------------------------------------------------------------------------------------------------------------------------------------------------------------|-----------------------------------------------------------------|
| <b>Bacterial strains</b>                      |                                                                                                                                                                                                                          |                                                                 |
| <i>W. succinogenes</i> DSMZ 1740              | Wild-type strain                                                                                                                                                                                                         | (Simon <i>et al.</i> , 2000)                                    |
| <i>W. succinogenes</i> $\Delta$ <i>frdCAB</i> | Fumarate reductase operon ( <i>frdCAB</i> ) deletion mutant                                                                                                                                                              | (Simon <i>et al.</i> , 1998)                                    |
| <i>W. succinogenes</i> fMFR                   | Strain expressing the <i>sdhABE</i> operon under control of the <i>frd</i> promoter                                                                                                                                      | This study                                                      |
| <i>W. succinogenes</i> fMFR-R7/8Q             | =fMFR; arginines 7 and 8 in <i>sdhA</i> are replaced by glutamines                                                                                                                                                       | This study                                                      |
| <i>W. succinogenes</i> fMFR-A86H              | =fMFR; alanine 86 replaced by a histidine                                                                                                                                                                                | This study                                                      |
| <i>W. succinogenes</i> fMFR-HT                | =fMFR; amino-terminal ( <i>sdhA</i> ) His6-tag plus TEV protease site                                                                                                                                                    | This study                                                      |
| <i>W. succinogenes</i> fMFR-AH1               | =fMFR; His6-tag introduced at amino acid position 37                                                                                                                                                                     | This study                                                      |
| <i>E. coli</i> XL1-blue                       | Strain used for cloning and plasmid propagation                                                                                                                                                                          | Stratagene                                                      |
| <b>Plasmids</b>                               |                                                                                                                                                                                                                          |                                                                 |
| pFrdcat2                                      | Derivative of pSC101; <i>E. coli</i> low-copy vector containing the <i>W. succinogenes</i> <i>frdCAB</i> genes including <i>frd</i> promoter and terminator sequences                                                    | (Simon <i>et al.</i> , 1998); sequence determined in this study |
| pSdhA                                         | Derivative of pFrdcat2 containing the <i>sdhA</i> gene instead of <i>frdCAB</i> genes from <i>W. succinogenes</i>                                                                                                        | This study                                                      |
| pR7/8Q                                        | Derivative of pSdhA; codons for arginines 7 and 8 are replaced by codons for glutamines                                                                                                                                  | This study                                                      |
| pA86H                                         | Derivative of pSdhA; codon for alanine 86 is replaced by a codon for histidine                                                                                                                                           | This study                                                      |
| pSdhHT                                        | Derivative of pSdhA; codons encoding for six histidines plus TEV protease site are inserted in <i>sdhA</i>                                                                                                               | This study                                                      |
| pSdhAH1                                       | Derivative of pSdhA; codons encoding for six histidines at amino acid position 37 are inserted in <i>sdhA</i>                                                                                                            | This study                                                      |
| <b>Primers</b>                                |                                                                                                                                                                                                                          |                                                                 |
| Not_cat2_Fw                                   | TATCAAAT <u>TGCGGCCG</u> CATCTCCTTGGAGCGGGGTCTCC Forward primer used for the amplification of the pFrdcat2 vector fragment; contains a <i>NotI</i> restriction site (underlined)                                         | This study                                                      |
| Sac_cat2_Rv                                   | TCC <u>CGCGGC</u> ATCTGTTTCCCTGTGCAGTATTG Reverse primer used for the amplification of the pFrdcat2 vector fragment; contains a <i>SacII</i> restriction site (underlined) and the <i>frdC</i> start codon (in boldface) | This study                                                      |
| Sac_Ws-Sdh_Fw                                 | TCC <u>CGCGG</u> GAGTGAACAATTTACCCGAAGGGAG Forward primer                                                                                                                                                                | This study                                                      |

|                |                                                                                                                                                                                                                         |                           |
|----------------|-------------------------------------------------------------------------------------------------------------------------------------------------------------------------------------------------------------------------|---------------------------|
|                | used for the amplification of <i>sdhA</i> from <i>W. succinogenes</i> genomic DNA;<br>contains a <i>SacII</i> restriction site (underlined)                                                                             |                           |
| Not_Ws-SdhA_Rv | TATCAAAT <u>TCGGCCGCT</u> TAGTATTTCCTCTCCTCAATTTGAATTG                                                                                                                                                                  | This study                |
|                | Reverse primer used for the amplification of <i>sdhA</i> from <i>W. succinogenes</i><br>genomic DNA; contains a <i>NorI</i> restriction site (underlined)                                                               |                           |
| cat2_seq1      | CTCTTACAGTTCCAAACTACC                                                                                                                                                                                                   | This study                |
|                | binds in the <i>frd</i> promoter on the plasmid pSdhA; a PCR product with primer<br>wssdhB1R indicates correct integration of pSdhA in the $\Delta$ <i>frdCAB</i> genome                                                |                           |
| wssdhB1R       | GAGCGTGATGTCTTGGGTTTGC                                                                                                                                                                                                  | This study                |
|                | binds in <i>sdhB</i> on the $\Delta$ <i>frdCAB</i> genome                                                                                                                                                               |                           |
| SdhR7/8Q1      | CGCGGAGTGAACAATTTACCAACAGGAGTTTCTTCAGTCTGCC                                                                                                                                                                             | This study                |
| SdhR7/8Q2      | GGCAGACTGAAGAACTCCTGTTGGGTAAATTGTTCACTCCGGC                                                                                                                                                                             |                           |
|                | Complementary mutagenic primers used for the replacement of arginines<br>7 and 8 to in SdhA to glutamines via site-directed mutagenesis; the changed<br>codons are underlined                                           |                           |
| A86H1          | GGTTATGCCACCCGAAGCCACACCACAATGGCTGAAGG                                                                                                                                                                                  | The present study         |
| A86H2          | CCTTCAGCCATTGTGGTGGCTTCGGGTGGGCATAACC                                                                                                                                                                                   |                           |
|                | Complementary mutagenic primers used for the replacement of alanine<br>86 to histidine in SdhA via site-directed mutagenesis; the changed codon<br>is underlined                                                        |                           |
| SacIIHis6TEV1  | TCC <u>CCGCGGCACCATCACCATCACCAT</u> GAGAATCTCTATTTTCA                                                                                                                                                                   | This study                |
|                | AGGACCGCGGCCT Encodes for a His6-tag (in boldface) plus TEV<br>protease site; used for insertion in the <i>SacII</i> restriction site of pSdhA;<br>contains two <i>SacII</i> restriction sites (underlined)             |                           |
| SacIIHis6TEV2  | AGG <u>CCGCGGTCCTTGAAAATAGAGATTCTCATGGTGATGGTGAT</u>                                                                                                                                                                    | This study                |
|                | <b>GGTGCCGCGGGA</b> Complementary to SacIIHis6TEV1                                                                                                                                                                      |                           |
| SdhH1_Fw       | ATGGG <u>CCCTCCCCATCAATACCTCTGGCATCCCC</u>                                                                                                                                                                              | Forward primer This study |
|                | used for the insertion of a His6-tag at amino acid position 37 via PCR from<br>pSdhA; contains a <i>ApaI</i> restriction site (underlined)                                                                              |                           |
| SdhH1_Rv       | TAGGG <u>CCCGGCATGGTGATGGTGATGGTG</u> GGAAGAGGAGGCAA                                                                                                                                                                    | This study                |
|                | AAGCCCTATCAACCCC Reverse primer used for the insertion of a<br>His6-tag at amino acid position 37 via PCR from pSdhA; contains a <i>ApaI</i><br>restriction site (underlined) and codons for 6 histidines (in boldface) |                           |

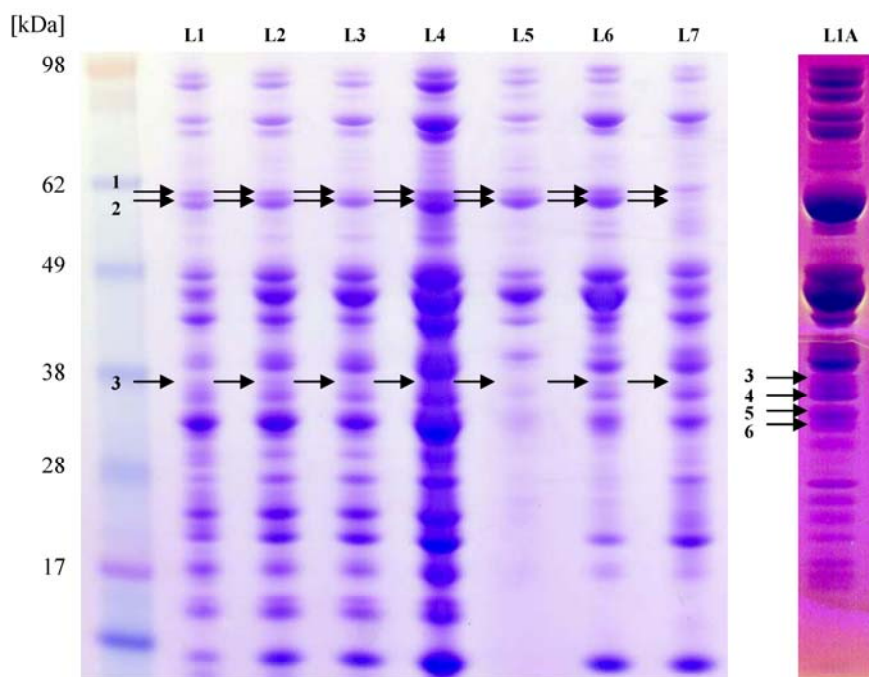

| b nr. | s   | m [kDa] | pI   | em | fm | sc  | protein                                                                              |
|-------|-----|---------|------|----|----|-----|--------------------------------------------------------------------------------------|
| 1     | 78  | 66.5    | 7.29 | 24 | 12 | 28% | 'Succinate Dehydrogenase' Flavoprotein Subunit, <i>W. succinogenes</i>               |
| 2     | 97  | 60      | 6.15 | 49 | 21 | 34% | Dihydroxy-Acid Dehydratase, <i>W. succinogenes</i>                                   |
| 3     | 76  | 35.7    | 7.53 | 52 | 11 | 37% | 'Succinate Dehydrogenase' Iron-Sulfur Protein, <i>W. succinogenes</i>                |
| 4     | 65  | 31.8    | 7.82 | 16 | 8  | 33% | Co-Chaperone-Curved DNA Binding Protein A (CBPA), <i>W. succinogenes</i>             |
| 5     | 55  | 29.2    | 5.65 | 25 | 7  | 41% | Septum Site-Determining Protein Mind Cell Division Inhibitor, <i>W. succinogenes</i> |
| 6     | 111 | 30.7    | 8.21 | 25 | 11 | 36% | 'Succinate Dehydrogenase' Subunit C, <i>W. succinogenes</i>                          |

**SUPPORTING FIGURE 1.** SDS-PAGE for peptide mass fingerprint analysis. Lanes 1-3: fractions with highest activity after 1<sup>st</sup> ion exchange chromatography, 20 µg protein per lane; lane 4: pooled and concentrated fractions after 1<sup>st</sup> ion exchange chromatography, 30 µg; lanes 5 and 6: fractions of highest activity after gel filtration, 5 µg; lane 7: pooled and concentrated fractions after gel filtration, 5 µg; lane 1A: fraction of highest activity after gel filtration, different preparation. The two prominent bands 1 and 2 and all bands between 38 kDa and 28 kDa were cut out, treated with trypsin and examined via MALDI-TOF. Assignment of the peaklists to the respective proteins was performed with the program 'Mascot'. Only assignments with a score of 54 and higher are shown (bands indicated by an arrow). Abbreviations: b nr.: band number; s: score; m: calculated mass from protein sequence; pI:

theoretical isoelectric point; em: entered mass values; fm: fitting mass values; sc: sequence coverage; protein: database output.

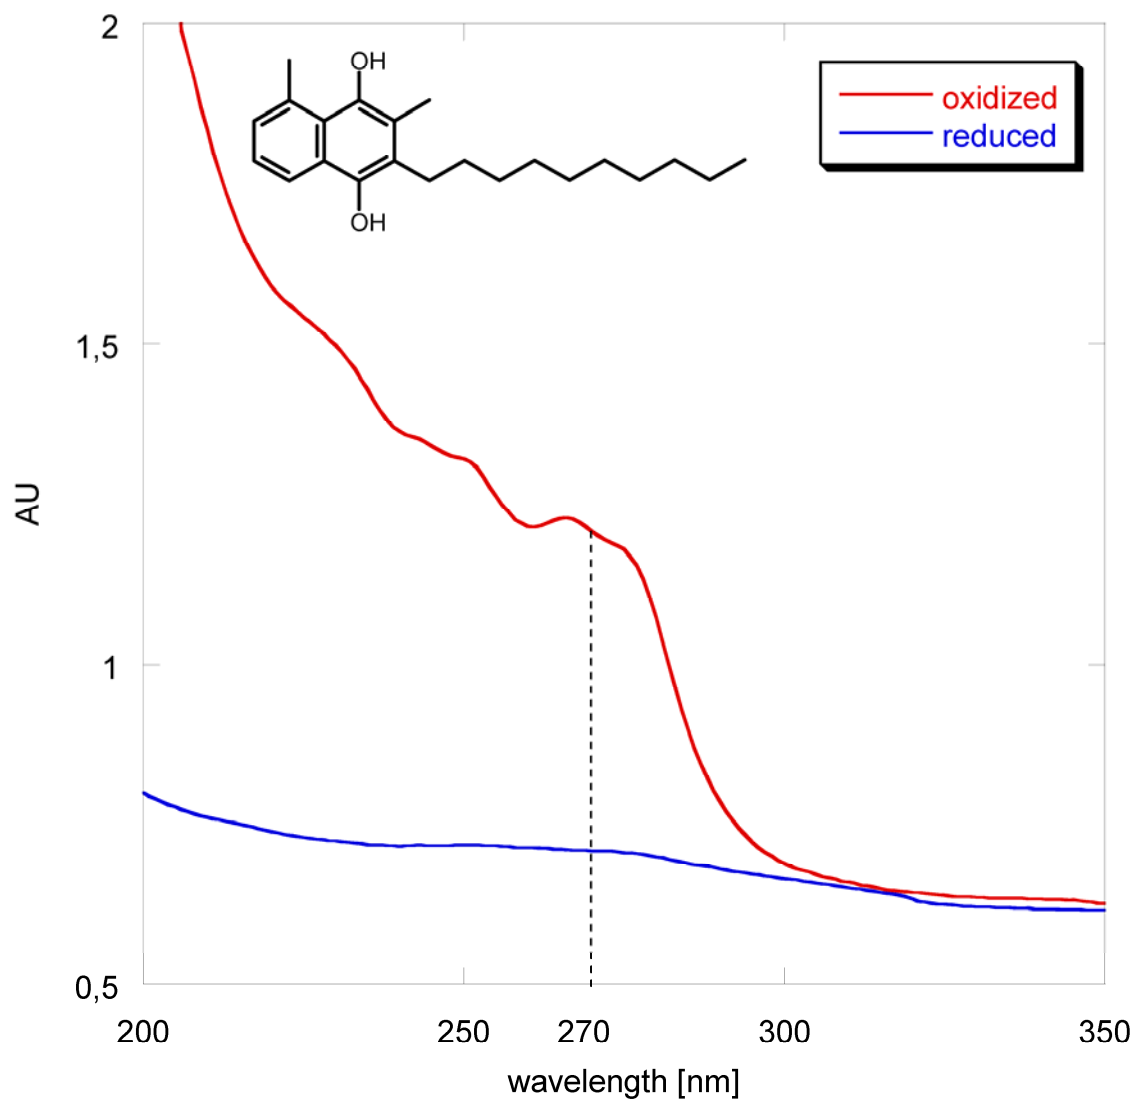

**SUPPORTING FIGURE 2.** Determination of the molar oxidized-minus-reduced absorption difference coefficient at 270 nm of the 8-methylmenaquinol-6 analog 2,8-dimethyl-3-decyl-1,4-dihydroxynaphthoquinol (the quinol form of the quinone shown in Fig 3g). The coefficient was determined from air-oxidized quinone and  $\text{KBH}_4$ -reduced quinol at a concentration of 0.1  $\mu\text{M}$ .

|                |   | n      | 78 | h | c |       |   |   |   |   |   |   |   |   |   |   |   |   |   |   |   |   |   |   |   |   |   |   |   |        |   |   |   |   |   |   |   |   |   |   |   |   |   |   |   |   |   |   |   |   |   |   |   |   |   |   |   |   |   |   |   |
|----------------|---|--------|----|---|---|-------|---|---|---|---|---|---|---|---|---|---|---|---|---|---|---|---|---|---|---|---|---|---|---|--------|---|---|---|---|---|---|---|---|---|---|---|---|---|---|---|---|---|---|---|---|---|---|---|---|---|---|---|---|---|---|---|
| <i>Ws</i> SdhA | 1 | m      | s  | e | q | f     | t | r | r | e | f | l | g | s | a | c | i | t | m | g | a | l | a | v | s | t | s | g | v | d      | r | a | f | a | s | s | s | l | p | i | n | t | s | g | i | p | s | c | d | v | l | i | i | g | s | g | a | a | g | l | r |
| <i>Cj</i> SdhA | 1 | m      | g  | e | - | f     | s | r | r | d | f | i | k | t | a | c | i | s | v | g | a | l | a | a | s | s | g | v | - | y      | a | l | d | d | s | s | k | m | d | k | d | i | n | l | p | s | c | d | v | l | v | i | g | s | g | g | a | g | l | c |   |
| <i>Aa</i> SdhA | 1 | -----m |    |   |   |       |   |   |   |   |   |   |   |   |   |   |   |   |   |   |   |   |   |   |   |   | e | k | l | -----s | y | d | a | i | v | i | g | g | l | a | g | l | m |   |   |   |   |   |   |   |   |   |   |   |   |   |   |   |   |   |   |
| <i>Sc</i> SdhA | 1 | m      | l  | e | q | ----- |   |   |   |   |   |   |   |   |   |   |   |   |   |   |   |   |   |   |   |   |   |   |   |        | d | v | v | i | v | g | g | l | a | g | c |   |   |   |   |   |   |   |   |   |   |   |   |   |   |   |   |   |   |   |   |

**SUPPORTING FIGURE 3.** Sequence alignment of the amino-termini of *W. succinogenes* (*Ws*), *C. jejuni* (*Cj*), *A. ambivalens* (*Aa*) and *Synechocystis* (*Sc*) SdhA. The amino-termini from the *W. succinogenes* and *C. jejuni* gene product are significantly longer than in the *A. ambivalens* and *Synechocystis* enzyme and harbour a twin-arginine motif (consensus sequence s/t-r-r-e-f-l-k/q), a signal for the export into the periplasm via the twin-arginine translocase (Tat) pathway. The amino acid composition corresponds to the generic tripartite structure (n-, h-, and c-region) of twin-arginine signal peptides (Palmer *et al.*, 2005). This signal is absent in the sequences of *A. ambivalens* and *Synechocystis* SdhA.

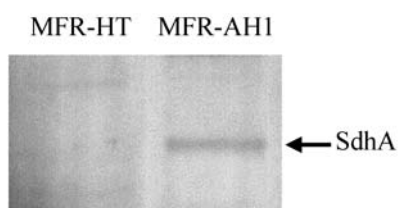

**SUPPORTING FIGURE 4.** Western blot analysis of the variant SdhABE complexes MFR-HT and MFR-AH1. The variant enzymes carry a 6xhis-tag on amino acid position 1 and 37, respectively (pooled fractions after anion exchange). However on a Western blot treated with anti-polyhistidine antibodies only the tag on amino acid position 37 is detectable.

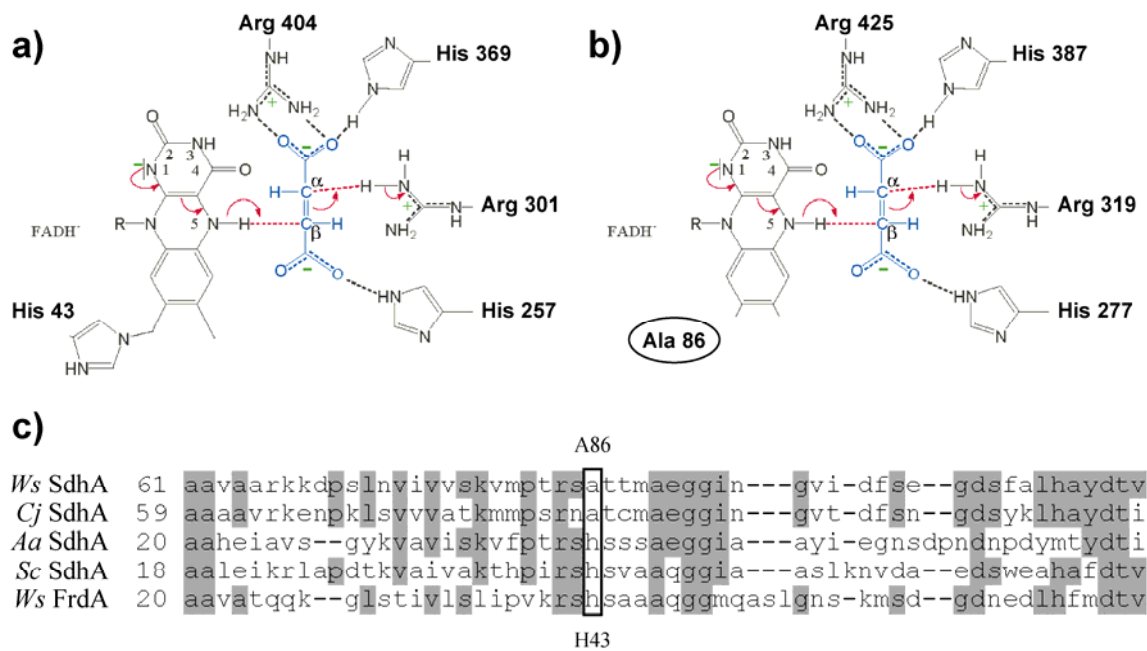

**SUPPORTING FIGURE 5.** Comparison of residues involved in fumarate reduction in the *W. succinogenes* quinol:fumarate reductase a) and the MFR b) (figure modified from Lancaster *et al.*, 2001). All residues required for the proposed mechanism are conserved except for the FAD-binding histidine 43 which corresponds to alanine 86 in the MFR. c) Sequence alignment of *W. succinogenes* (*Ws*), *C. jejuni* (*Cj*), *A. ambivalens* (*Aa*), *Synechocystis* (*Sc*) SdhA and *W. succinogenes* FrdA subunits. Only the region surrounding alanine 86 is shown.



## SUPPORTING REFERENCES

- Lancaster, C.R.D., Groß, R., and Simon, J. (2001) A third crystal form of *Wolinella succinogenes* quinol:fumarate reductase reveals domain closure at the site of fumarate reduction. *Eur J Biochem* **268**: 1820-1827.
- Palmer, T., Sargent, F., and Berks, B.C. (2005) Export of complex cofactor-containing proteins by the bacterial Tat pathway. *Trends Microbiol* **13**: 175-180.
- Simon, J., Groß, R., Ringel, M., Schmidt, E., and Kröger, A. (1998) Deletion and site-directed mutagenesis of the *Wolinella succinogenes* fumarate reductase operon. *Eur J Biochem* **251**: 418-426.
- Simon, J., Groß, R., Klimmek, O., and Kröger, A., (eds) (2000) *The Genus Wolinella*. New York: Springer-Verlag.
